# Supplementary material for: Synergistic effects from graphene oxide nanosheets and TiO2 hierarchical structures enable robust and resilient electrodes for high-performance lithium-ion batteries
Source: Royal Society of Chemistry journal article supplement (doi:10.1039/c5ra24131f), 2015-12-21
Supplement: c5ra24131f1.pdf [file c5ra24131f1.pdf]

Supplementary Material (ESI) for RSC Advances  
This journal is © The Royal Society of Chemistry 2015  
Electronic Supporting Information

## Synergistic effects from graphene oxide nanosheets and TiO<sub>2</sub> hierarchical structure enable robust and resilient electrodes for high-performance lithium-ion batteries†

Xing Li, Chunmei Zhang and Tao Meng\*

*Centre for Physical and Chemical Analysis, Beijing Institute of Graphic Communication, Beijing102600, China. Email: tmeng@bigc.edu.cn*

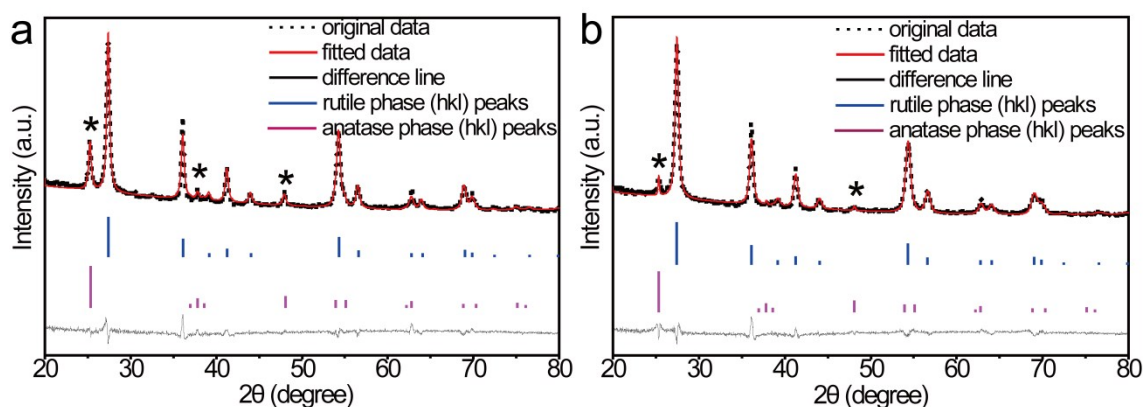

Fig. S1. Rietveld refinement of (a) rutile/anatase TiO<sub>2</sub> and (b) rutile/anatase TiO<sub>2</sub>@GO samples (Asterisk \* represents anatase peaks in mixed phases).

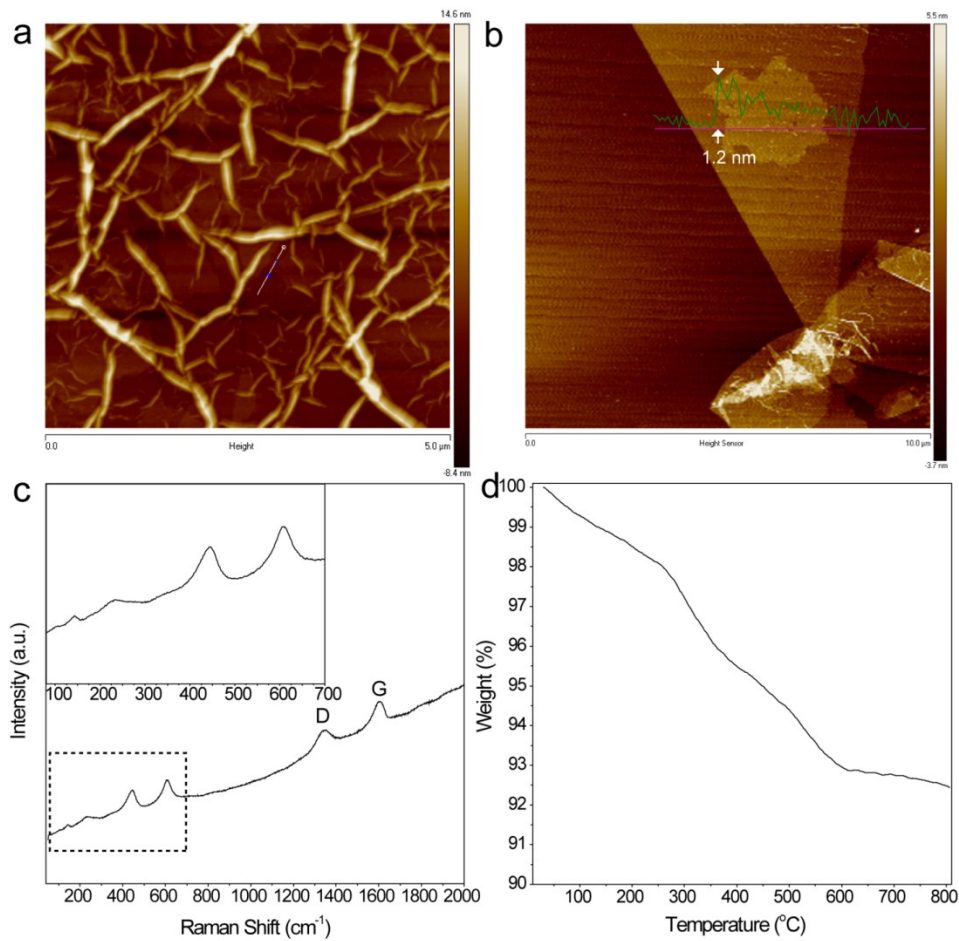

**Fig. S2** (a) The representative AFM image of GO and (b) corresponding height profiles taken from the pink line. (c) Raman spectra of the rutile/anatase TiO<sub>2</sub>@GO hierarchical structure; (b) TGA curves of the rutile/anatase TiO<sub>2</sub>@GO hierarchical structure.

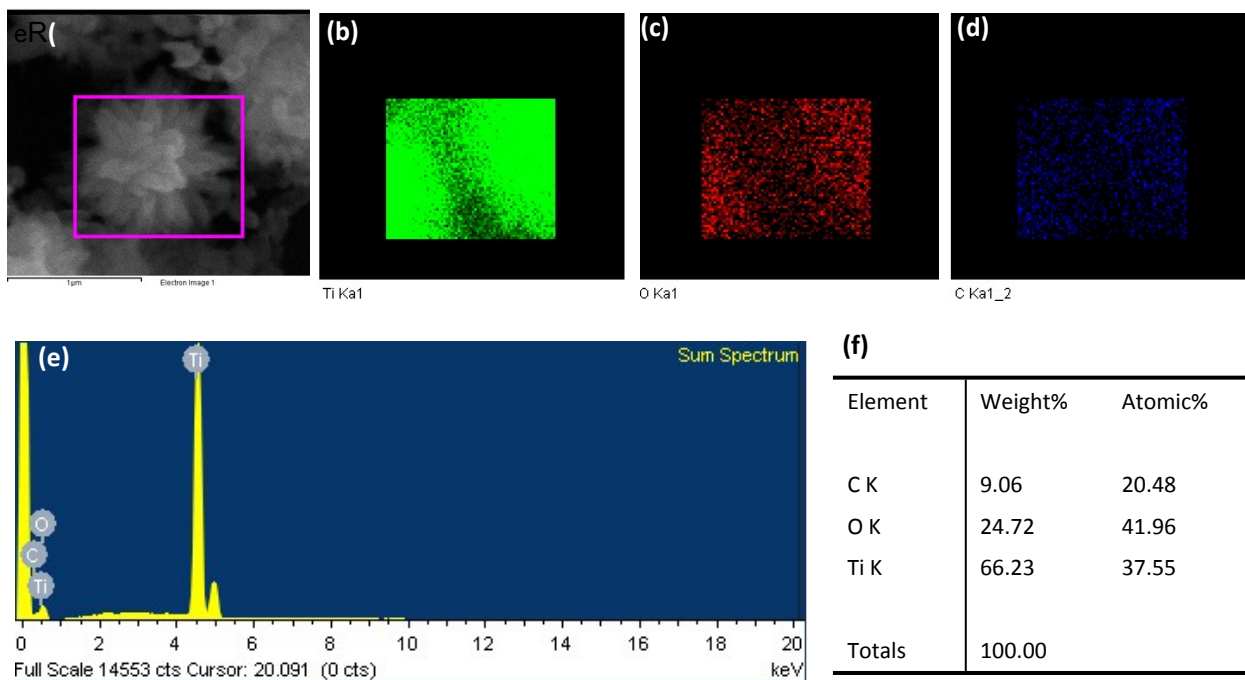

**Fig. S3** SEM images of the (a) rutile/anatase  $\text{TiO}_2$ @GO hierarchical structure and the corresponding EDX mapping images of (b) Ti, (c) O and (d) C elements. (e) EDX spectrum and (f) sum table of rutile/anatase  $\text{TiO}_2$ @GO hierarchical structure.

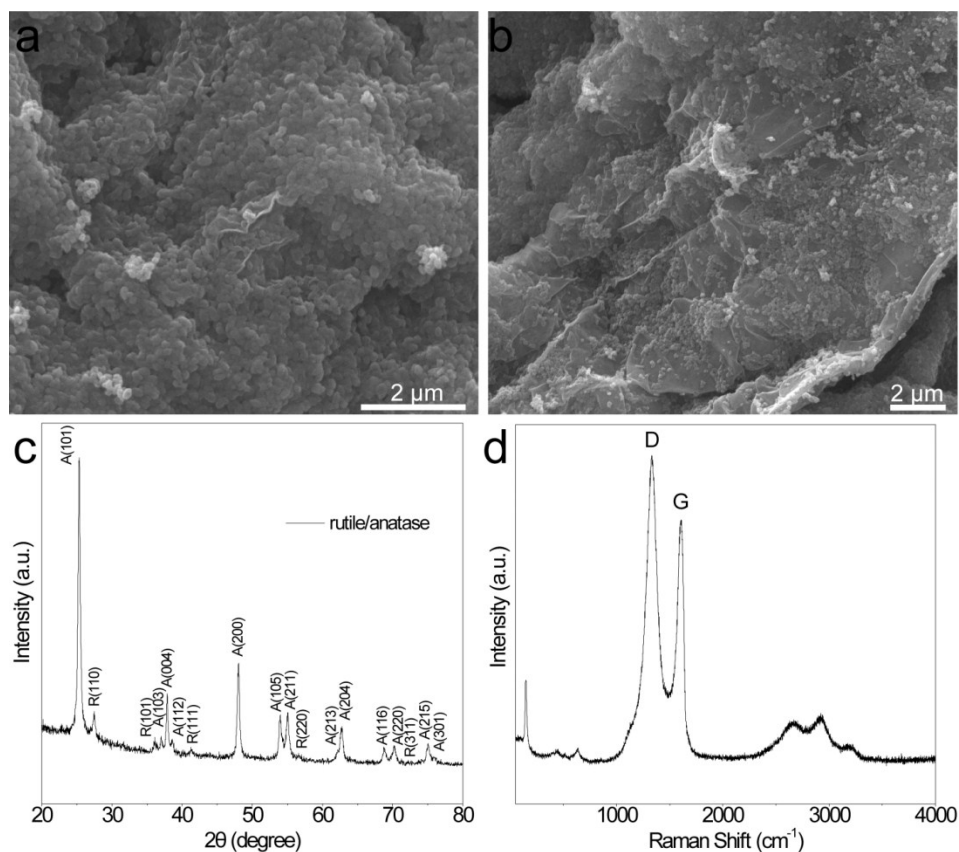

**Fig. S4** (a) and (b) SEM images, (c) XRD and (d) Raman spectra of rutile/anatase  $\text{TiO}_2$  nanoparticle/graphene composite

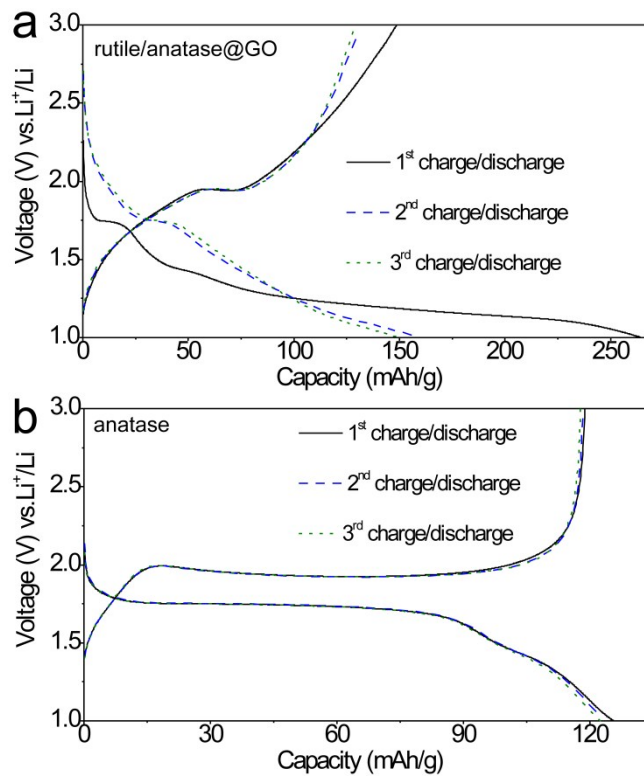

**Fig. S5** Charge/discharge curves of (a) rutile/anatase@GO composite and (b) anatase electrodes between 1.0 V and 3.0 V at 0.5 C rate.

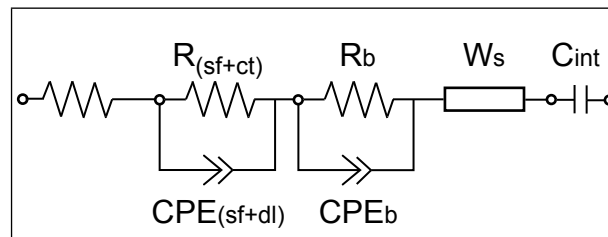

**Fig. S6** The modified Randles equivalent circuit used to fit Nyquist plots.

**Table S1.** The kinetic parameters of rutile, rutile/anatase, anatase, and anatase/rutile  $\text{TiO}_2$ @GO electrodes .

| Samples       | rutile        | rutile/anatase | anatase       | rutile/anatase@GO |
|---------------|---------------|----------------|---------------|-------------------|
| $R_e$         | 2.5 $\Omega$  | 2.5 $\Omega$   | 2.9 $\Omega$  | 2.6 $\Omega$      |
| $R_{(sf+ct)}$ | 20.5 $\Omega$ | 6.0 $\Omega$   | 4.9 $\Omega$  | 1.5 $\Omega$      |
| $R_b$         | 43.0 $\Omega$ | 30.7 $\Omega$  | 37.9 $\Omega$ | 26.2 $\Omega$     |
